# Supplementary material for: Exercise and reproductive function in polycystic ovary syndrome: protocol of a systematic review
Source: Springer Nature journal article supplement (doi:10.1186/s13643-017-0666-5), 2017-12-01
Supplement: MOESM2 [file 15329144]

Database: PUBMED>

Search Strategy:

---

- 1 Exercise
- 2 Sport
- 3 Fitness
- 4 Exercise therapy
- 5 Exercise training
- 6 Exercise program
- 7 Exercise regime
- 8 Physical activity
- 9 Vigorous activity
- 10 Moderate activity
- 11 Aerobic exercise
- 12 Aerobic capacity
- 13 Aerobic training
- 14 Resistance training
- 15 Ovulation
- 16 Follicle-stimulating hormone (FSH)
- 17 Luteinizing hormone (LH)
- 18 Menstrual Cycle
- 19 Menstruation
- 20 Follicular Phase
- 21 Luteal Phase
- 22 Infertility
- 23 Female Infertility
- 24 Sterility
- 25 Female Sub-Fertility
- 26 Polycystic ovary syndrome
- 27 Stein-Leventhal Syndrome
- 28 Function reproductive
- 29 Randomized control trials (RCT)
- 30 Clinical trial
- 31 Controlled clinical trial
- 32 Pragmatic Clinical Trial
